# Supplementary material for: Piezo1 incorporates mechanical force signals into the genetic program that governs lymphatic valve development and maintenance
Source: JCI journal article supplement (doi:10.1172/jci.insight.125068), 2019-01-24
Supplement: sd1 [file 1]

## SUPPLEMENTAL INFORMATION

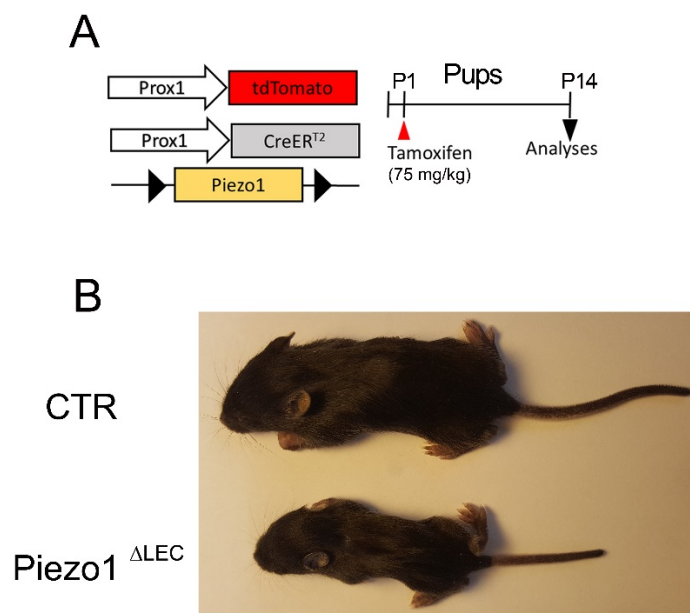**Supplemental Figure 1. Effect of Lymphatic *Piezo1* Deletion on Body Growth. (A)**

Experimental design: Control pups (CTR) harbor *Prox1-tdTomato* and *Prox1-CreER<sup>T2</sup>* alleles without floxed *Piezo1*. Lymphatic *Piezo1* KO (*Piezo1*<sup>ΔLEC</sup>) pups have *Prox1-tdTomato*, *Prox1-CreER<sup>T2</sup>*, and *Piezo1*<sup>fl/fl</sup>. Tamoxifen (75 mg/kg) was injected into pups at P1, and whole mouse images were taken at P14. (B) Lymphatic *Piezo1* KO inhibited the body growth of the mutant pups, compared to the control littermate.

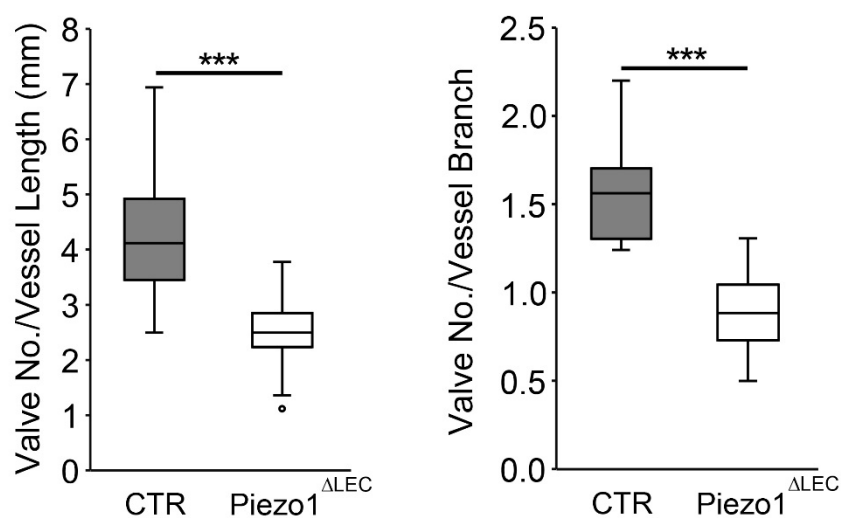

**Supplemental Figure 2. *Piezo1* Deletion by *Cdh5* (PAC)-*CreER*<sup>T2</sup> Allele Reduced Mesenteric Lymphatic Valve Formation in the Jejunum.** Number of lymphatic valves shown in Figure 1 V and W was quantified in the jejunum of the control or *Piezo1* KO pups (*Cdh5* (PAC)-*CreER*<sup>T2</sup>; *Prox1-tdTomato*; *Piezo1*<sup>fl/fl</sup>). Statistics: \*\*\*,  $p < 0.001$ , unpaired, two-tailed, *t*-test. > 5 pups (males and females) were used for each group.

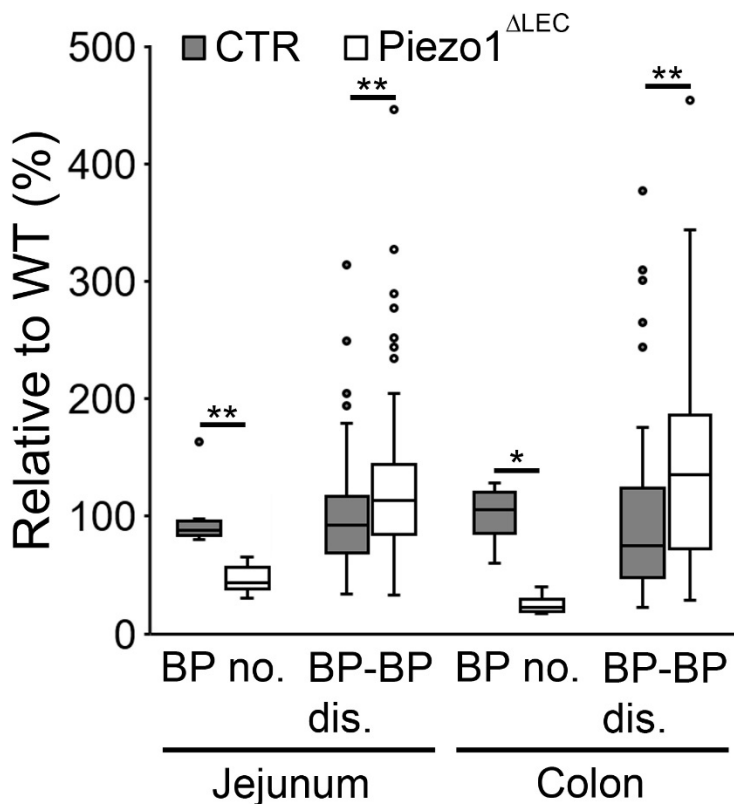

Lymphatic vessel density of *Piezo1* KO pups (*Prox1-CreER<sup>T2</sup>; Prox1-tdTomato; Piezo1<sup>fl/fl</sup>*), shown in Figure 1 B-E (Jejunum) and F-I (Colon), was quantified and expressed against that of wild type control pups. BP, branching point of lymphatic vessels; BP-BP dis., distance between two branching points. Statistics: \*,  $p < 0.05$ ; \*\*,  $p < 0.01$ , unpaired, two-tailed,  $t$ -test. > 5 pups (males and females) were used for each group.

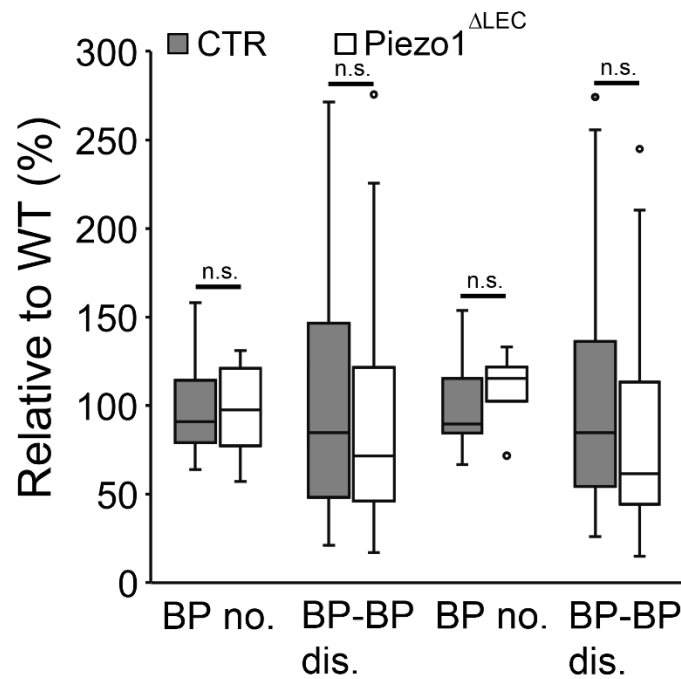

**Supplemental Figure 4. *Piezo1* Deletion by *Prox1-CreER<sup>T2</sup>* Allele Activated with Low-dose Tamoxifen Did Not Affect Lymphatic Vessel Density.** Lymphatic vessel density was quantified in the control or *Piezo1* KO pups, as shown in Figure2 F-I (Jejunum) and J-M (Colon). No significant difference was found in the lymphatic density, expressed by the number of branching point (BP no), and distance between two branching points (BP-BP dis.). n.s., not significant. Unpaired, two-tailed, *t*-test. Three pups were used for each group.

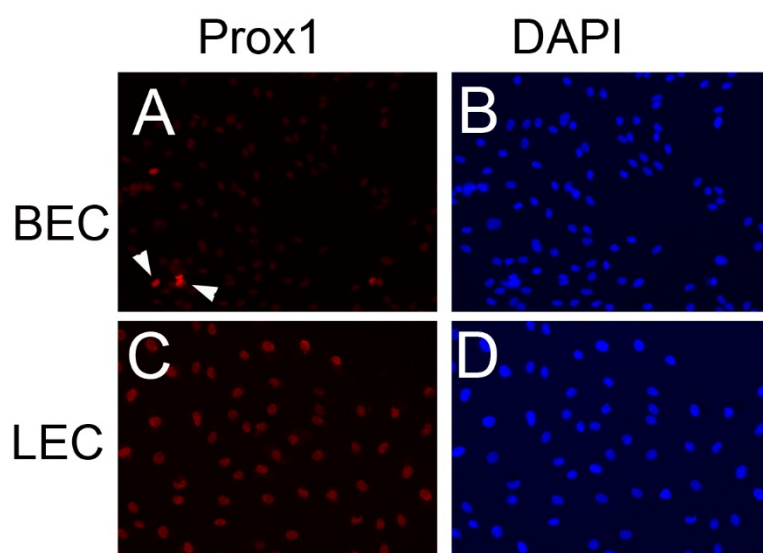

**Supplemental Figure 5. Validation of Purified Primary Human Lymphatic Endothelial Cells.** Immunofluorescence staining for Prox1 in purified dermal blood vessel endothelial cells (BEC;A,B) and lymphatic endothelial cells (LEC;C,D). Note that LECs are all Prox1-positive (C). Prox1 staining images (A,C) were acquired with the same capture condition (exposure time, gain, etc). White arrows in panel A point 1~2% cells of BEC population that are Prox1-positive, which are presumably contaminated LEC from the cell purification process, and serve as positive controls for Prox1 staining.

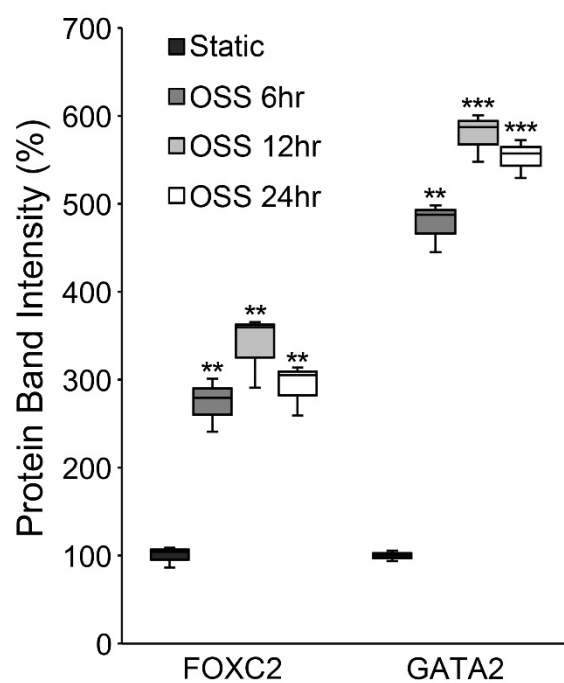

**Supplemental Figure 6. Upregulation of FOXC2 and GATA2 in LECs by OSS.** Relative protein band intensity for FOXC2 and GATA2 shown in Figure 4C. Statistics: \*\*,  $p < 0.01$ , \*\*\*,  $p < 0.001$ , unpaired, two-tailed,  $t$ -test.

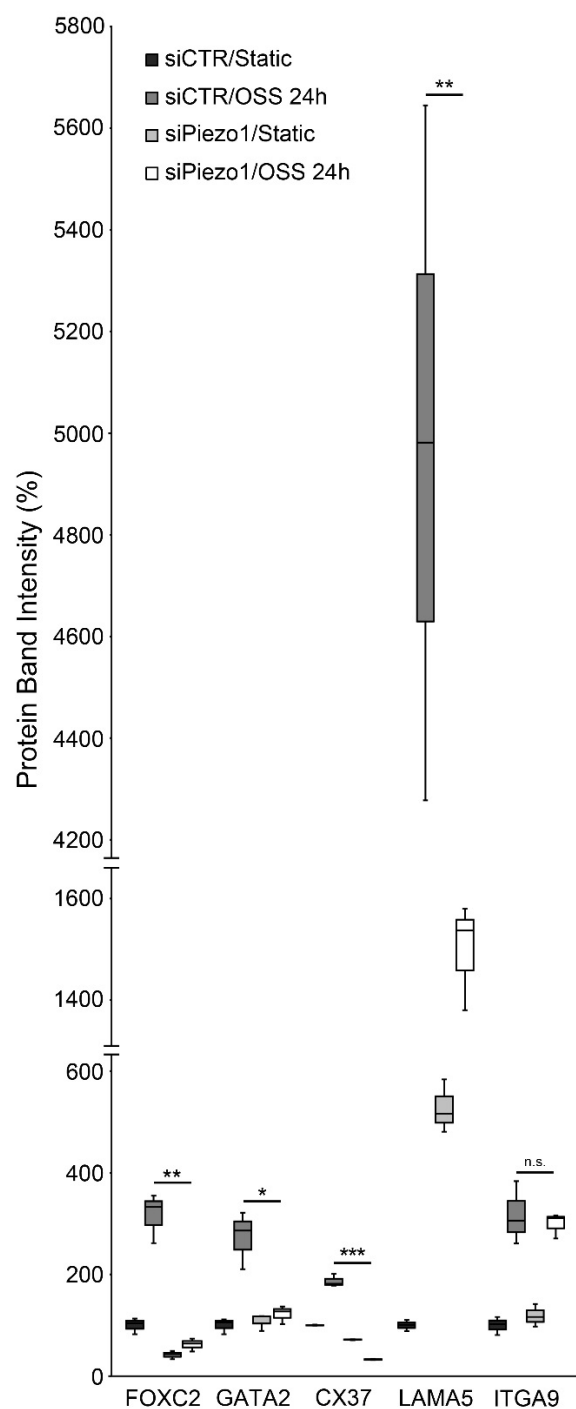

**Supplemental Figure 7. Piezo1-Dependent Expression of Lymphatic Valve-Signature Genes by Oscillatory Shear Stress.** Relative intensity of the western protein band for FOXC2, GATA2, CX37, LAMA5, and ITGA9 shown in Figure 4F. Statistics: \*,  $p < 0.05$ ; \*\*,  $p < 0.01$ ; \*\*\*,  $p < 0.001$ ; n.s., not significant; unpaired, two-tailed,  $t$ -test.
